# Supplementary material for: The macroparasite fauna of cichlid fish from Nicaraguan lakes, a model system for understanding host–parasite diversification and speciation
Source: PubMed Central journal article supplement (PMC8913791; doi:10.1038/s41598-022-07647-w), 2022-03-10
Supplement: 41598_2022_7647_MOESM1_ESM.pdf [file 41598_2022_7647_MOESM1_ESM.pdf]

## **Supplementary Material**

**The macroparasite fauna of cichlid fish from Nicaraguan lakes, a model system for understanding host-parasite diversification and speciation**

Ana Santacruz, Marta Barluenga and Gerardo Pérez-Ponce de León

**Supplementary Table S1.** GenBank accession numbers and CNHE or CNCR catalog numbers.

| Parasite                                   | cox1        | cox2     | 28S         | 18S         | ITS      | CNHE        | CNCR        |
|--------------------------------------------|-------------|----------|-------------|-------------|----------|-------------|-------------|
| <b>Trematoda</b>                           |             |          |             |             |          |             |             |
| <i>Ascocotyle pindoramensis</i>            | -           | -        | OL960048-50 | -           | -        | -           | -           |
| <i>Austrodiplostomum compactum</i>         | -           | -        | -           | -           | -        | 11496       | -           |
| <i>Crassicutis cichlasomae</i>             | OM514320-23 | -        | -           | -           | OL872180 | 11483-11486 | -           |
| <i>Ithyoclinostomum yamagutii</i>          | -           | -        | -           | -           | -        | 11498       | -           |
| Heterophyidae gen. sp.                     | -           | -        | -           | -           | -        | 11504       | -           |
| <i>Oligogonotylus manteri</i>              | OM514349-52 | -        | OL960047    | -           | -        | 11487-11490 | -           |
| <i>Phostodiplostomum</i> sp. 1             | -           | -        | -           | -           | -        | 11500       | -           |
| <i>Phostodiplostomum</i> sp. 2             | -           | -        | -           | -           | -        | 11501       | -           |
| <i>Saccocoelioides orosiensis</i>          | OM540397-99 | -        | -           | -           | -        | -           | -           |
| <i>Saccocoelioides</i> cf. <i>lamothei</i> | OM540400-01 | -        | -           | -           | -        | -           | -           |
| <b>Monogenea</b>                           |             |          |             |             |          |             |             |
| <i>Sciadicleithrum mexicanum</i>           | OM540389-94 | -        | OL960045    | -           | -        | 11475-11480 | -           |
| <i>Sciadicleithrum nicaraguensis</i>       | -           | -        | OL960043-44 | -           | -        | 11481       | -           |
| <i>Sciadicleithrum</i> sp. 1               | OM540395    | -        | OL960046    | -           | -        | -           | -           |
| <b>Acanthocephala</b>                      |             |          |             |             |          |             |             |
| <i>Neoechinorynchus costarricense</i>      | OM540396    | -        | OL960051    | -           | -        | 11507       | -           |
| <b>Nematoda</b>                            |             |          |             |             |          |             |             |
| <i>Contraeaecum</i> sp. 1                  | -           | OM524389 | -           | -           | -        | -           | -           |
| <i>Hysterothylacium</i> sp.                | -           | -        | -           | -           | -        | 11506       | -           |
| <i>Physocephalus</i> sp.                   | -           | -        | -           | -           | -        | 11505       | -           |
| <i>Procamallanus barlowi</i>               | MW487882-87 | -        | MW485591-93 | -           | -        | 11472-11473 | -           |
| <b>Copepoda</b>                            |             |          |             |             |          |             |             |
| <i>Acusicola margulisae</i>                | MN854838-70 | -        | MN852849-51 | MN852694-96 | -        | -           | 35553-35553 |
| Ergasilidae gen. sp.                       | OM541914    | -        | -           | -           | -        | -           | -           |
| Lernaeidae gen. sp.                        | OM541913    | -        | -           | -           | -        | -           | -           |

**Supplementary Table S2.** Primers used for PCR and sequencing of parasites in this study.

| Genetic region | Primer name | F/ R | Sequence (5'- 3')                      | Reference                  |
|----------------|-------------|------|----------------------------------------|----------------------------|
| cox1           | JB3/ Asmit1 | F    | TTTTTTGGGCATCCTGAGGTTTAT               | 1                          |
|                | JB4.5       | R    | TAAAGAAAGAACATAATGAAAATG               | 1                          |
|                | Schisto3    | R    | TAATGCATMGGAAAAAACA                    | 2                          |
|                | 507         | F    | AGTTCTAATCATAARGATATYGG                | 3                          |
|                | HCO2198     | R    | TAAACTTCAGGGTGACCAAAAATCA              | 4                          |
|                | pr-b        | R    | AGTTCTAATCATAARGATATYGG                | 5                          |
|                | MplatCOX1dF | F    | TGTAAAACGACGGCCAGTTTWCITTRGATCATAAG    | 6                          |
|                | MplatCOX1dR | R    | CAGGAAACAGCTATGACTGAAAYAAIIGGATCICCACC | 6                          |
|                | cox2        | 210  | F                                      | TTTTCTAGTTATATAGATTGRTTYAT |
| 211            |             | R    | CACCAACTCTTAAAATTATC                   | 7                          |
| 28S            | 391         | F    | AGCGGAGGAAAAGAACTAA                    | 8                          |
|                | 536         | R    | CAGCTATCCTGAGGGAAAC                    | 9                          |
|                | 502*        | F    | CAAGTACCGTGAGGGAAAGTTGC                | 9                          |
|                | 28SF        | F    | ACAACGTGATGCCCTTAG                     | 10                         |
|                | 28SR        | R    | TGGTCCGTGTTCAAGACG                     | 10                         |
|                | U178        | F    | GCACCCGCTGAAYTTAAG                     | 2                          |
|                | 1200R*      | R    | GCATAGTTCACCATCTTTCGG                  | 2                          |
|                | L1642       | R    | CCAGCGCCATCCATTTTCA                    | 2                          |
|                | 18S         | 18SF | F                                      | AAGGTGTGMCCTATCAACT        |
| 18SR           |             | R    | TTACTTCCTCTAAACGCTC                    | 10                         |

F: forward primer; R: reverse primer

Asterisk indicates primers used only in sequencing reaction.

## REFERENCES

1. Bowles, J., Blair, D. & McManus, D. P. Genetic variants within the genus *Echinococcus* identified by mitochondrial DNA sequencing. *Mol. Biochem. Parasitol.* **54**, 165–173 (1992).
2. Lockyer, A. E., Olson, P. D. & Littlewood, D. T. J. Utility of complete large and small subunit rRNA genes in resolving the phylogeny of the Neodermata (Platyhelminthes): Implications and a review of the cercomer theory. *Biol. J. Linn. Soc.* **78**, 155–171 (2003).
3. Nadler, S. A., Bolotin, E. & Stock, S. P. Phylogenetic relationships of *Steinernema* Travassos, 1927 (Nematoda: Cephalobina: Steinernematidae) based on nuclear, mitochondrial and morphological data. *Syst. Parasitol.* **63**, 161–181 (2006).
4. Black, M. *et al.* DNA primers for amplification of mitochondrial cytochrome c oxidase subunit I from diverse metazoan invertebrates. *Mol. Mar. Biol. Biotechnol.* **3**, 294–299 (1994).
5. Bessho, Y., Ohama, T. & Osawa, S. Planarian mitochondria I. Heterogeneity of cytochrome c oxidase subunit I gene sequences in the freshwater planarian, *Dugesia japonica*. *J. Mol. Evol.* **34**, 324–330 (1992).
6. Moszczyńska, A., Locke, S. A., McLaughlin, J. D., Marcogliese, D. J. & Crease, T. J. Development of primers for the mitochondrial cytochrome c oxidase i gene in digenetic trematodes (Platyhelminthes) illustrates the challenge of barcoding parasitic helminths. *Mol. Ecol. Resour.* **9**, 75–82 (2009).
7. Nadler, S. A. & Hudspeth, D. S. S. Phylogeny of the ascaridoidea (Nematoda: Ascaridida) based on three genes and morphology: Hypotheses of structural and sequence evolution. *J. Parasitol.* **86**, 380–393 (2000).
8. Nadler, S. A. & Hudspeth, D. S. S. Ribosomal DNA and Phylogeny of the Ascaridoidea (Nemata: Secernentea): Implications for Morphological Evolution and Classification. *Mol. Phylogenet. Evol.* **10**, 221–236 (1998).
9. García-Varela, M. & Nadler, S. A. Phylogenetic relationships of palaeacanthocephala (Acanthocephala) inferred from SSU and LSU rDNA gene sequences. *J. Parasitol.* **91**, 1401–1409 (2005).
10. Song, Y., Wang, G. T., Yao, W. J., Gao, Q. & Nie, P. Phylogeny of freshwater parasitic copepods in the Ergasilidae (Copepoda: Poecilostomatoida) based on 18S and 28S rDNA sequences. *Parasitol. Res.* **102**, 299–306 (2008).

**Supplementary Table S3.** Species of cichlids sampled in two great and five crater lakes of Nicaragua between 2017 and 2019, indicating overall prevalence of macroparasites per sampling year. Ne. Number of fish examined, Ni. Number of fish infected, P. prevalence (%).

| Lake                | Host species                          | Host code | Year |    |      |      |    |      |      |    |     | Total |
|---------------------|---------------------------------------|-----------|------|----|------|------|----|------|------|----|-----|-------|
|                     |                                       |           | 2017 |    |      | 2018 |    |      | 2019 |    |     |       |
|                     |                                       |           | Ne   | Ni | P    | Ne   | Ni | P    | Ne   | Ni | P   |       |
| Asososca León (108) | <b><i>Amphilophus citrinellus</i></b> | AciAsL    | 20   | 20 | 100  | 28   | 28 | 100  | 23   | 23 | 100 | 71    |
|                     | <i>Oreochromis</i> sp.                | OreAsL    | 3    | 3  | 100  | 3    | 3  | 100  | 8    | 3  |     | 14    |
|                     | <i>Parachromis</i> spp.               | ParAsL    | 5    | 5  | 100  | 12   | 12 | 100  | 6    | 6  | 100 | 23    |
| Apoyeque (26)       | <b><i>Amphilophus citrinellus</i></b> | AciAye    | 22   | 22 | 100  | -    | -  | -    | -    | -  | -   | 22    |
|                     | <i>Parachromis</i> spp.               | ParAye    | 4    | 4  | 100  | -    | -  | -    | -    | -  | -   | 4     |
| Apoyo (117)         | <b><i>Amphilophus astorquii</i></b>   | AasApo    | 16   | 16 | 100  | 4    | 4  | 100  | 7    | 7  | 100 | 27    |
|                     | <b><i>Amphilophus chanco</i></b>      | AchApo    | 15   | 15 | 100  | 5    | 5  | 100  | 13   | 13 | 100 | 33    |
|                     | <b><i>Amphilophus flavealus</i></b>   | AflApo    | 1    | 1  | 100  | -    | -  | -    | -    | -  | -   | 1     |
|                     | <b><i>Amphilophus zaliosus</i></b>    | AzaApo    | 14   | 14 | 100  | 5    | 5  | 100  | 14   | 14 | 100 | 33    |
|                     | <b><i>Amphilophus globosus</i></b>    | AglApo    | -    | -  | -    | -    | -  | -    | 3    | 3  | 100 | 3     |
|                     | <i>Amatitlania nigrofasciata</i>      | NigApo    | -    | -  | -    | 11   | 10 | 90.9 | 6    | 5  |     | 17    |
|                     | <i>Parachromis</i> spp.               | ParApo    | -    | -  | -    | 3    | 3  | 100  | -    | -  |     | 3     |
| Masaya (39)         | <b><i>Amphilophus citrinellus</i></b> | AciMas    | 25   | 25 | 100  | 10   | 10 | 100  | -    | -  | -   | 35    |
|                     | <i>Cribroheros longimanus</i>         | LonMas    | 3    | 3  | 100  | -    | -  | -    | -    | -  | -   | 3     |
|                     | <i>Hypsophrys nematopus</i>           | NeeMas    | -    | -  | -    | 1    | 1  | 100  | -    | -  | -   | 1     |
| Xiloá (145)         | <b><i>Amphilophus amarillo</i></b>    | AmaXil    | 16   | 16 | 100  | 5    | 3  | 60   | 1    | 1  | 100 | 22    |
|                     | <b><i>Amphilophus sagittae</i></b>    | AsaXil    | 16   | 16 | 100  | 27   | 27 | 100  | 6    | 6  | 100 | 49    |
|                     | <b><i>Amphilophus xiloaensis</i></b>  | AxiXil    | 11   | 11 | 100  | 4    | 4  | 100  | 7    | 7  | 100 | 22    |
|                     | <i>Amatitlania nigrofasciata</i>      | NigXil    | -    | -  | -    | 5    | 3  |      | 4    | 4  | 100 | 9     |
|                     | <i>Cribroheros longimanus</i>         | LonAxil   | -    | -  | -    | 2    | 2  | 100  | 3    |    |     | 5     |
|                     | <i>Cribroheros rostratus</i>          | RosXil    | -    | -  | -    | 3    | 3  | 100  | 4    | 4  | 100 | 7     |
|                     | <i>Hypsophrys nematopus</i>           | NeeXil    | -    | -  | -    | 4    | 2  | 50   | 3    | 2  |     | 7     |
|                     | <i>Hypsophrys nicaraguensis</i>       | HypXil    | -    | -  | -    | 7    | 7  | 100  | 6    |    |     | 13    |
|                     | <i>Parachromis</i> spp.               | ParXil    | 5    | 5  | 100  | 5    | 5  | 100  | 1    | 1  | 100 | 11    |
| Managua (152)       | <b><i>Amphilophus citrinellus</i></b> | AciMan    | 30   | 29 | 96.6 | 30   | 30 | 100  | 26   | 26 | 100 | 86    |
|                     | <b><i>Amphilophus labiatus</i></b>    | AlaMan    | 9    | 9  | 100  | 7    | 7  | 100  | 5    | 5  | 100 | 21    |
|                     | <i>Cribroheros rostratus</i>          | RosMan    | 1    | 1  | 100  | 3    | 3  | 100  | 6    | 5  |     | 10    |
|                     | <i>Hypsophrys nematopus</i>           | NeeMan    | -    | -  | -    | -    | -  | -    | 8    |    | 100 | 8     |
|                     | <i>Oreochromis</i> sp.                | OreMan    | -    | -  | -    | 6    | 0  | 0    | 11   | 7  |     | 17    |
|                     | <i>Parachromis</i> spp.               | ParMan    | 3    | 3  | 100  | 4    | 4  | 100  | 3    | 3  | 100 | 10    |
| Nicaragua (167)     | <b><i>Amphilophus citrinellus</i></b> | AciNic    | 9    | 9  | 100  | 21   | 21 | 100  | 15   | 15 | 100 | 45    |
|                     | <b><i>Amphilophus labiatus</i></b>    | AlaNic    | 14   | 14 | 100  | 13   | 13 | 100  | 12   | 12 | 100 | 39    |
|                     | <i>Amatitlania nigrofasciata</i>      | NigNic    | -    | -  | -    | -    | -  | -    | 3    |    | 100 | 3     |
|                     | <i>Archocentrus centrarchus</i>       | CenNic    | -    | -  | -    | -    | -  | -    | 8    | 7  |     | 8     |
|                     | <i>Cribroheros longimanus</i>         | LonNic    | -    | -  | -    | 1    | 1  | 100  | 2    | 2  | 100 | 3     |
|                     | <i>Cribroheros rostratus</i>          | RosNic    | -    | -  | -    | 8    | 8  | 100  | 3    |    | 100 | 11    |
|                     | <i>Herotilapia multispinosa</i>       | HmuNic    | -    | -  | -    | -    | -  | -    | 1    | 1  | 100 | 1     |
|                     | <i>Hypsophrys nematopus</i>           | NeeNic    | -    | -  | -    | 13   | 13 | 100  | 1    | 1  | 100 | 14    |
|                     | <i>Hypsophrys nicaraguensis</i>       | HypNic    | -    | -  | -    | 13   | 12 |      | 3    | 2  |     | 16    |
|                     | <i>Parachromis</i> spp.               | ParNic    | 3    | 3  | 100  | 6    | 6  | 100  | 14   | 14 | 100 | 23    |
|                     | <i>Vieja</i> sp.                      | VieNic    | 1    | 0  | 0    | 3    | 3  | 100  | -    | -  | -   | 4     |

**Supplementary Table 4.** Host-parasite records within lakes. In bold the Midas cichlids species are indicated.

| Lake             | Species                                    | Host species                                                                                                                                                                                           |
|------------------|--------------------------------------------|--------------------------------------------------------------------------------------------------------------------------------------------------------------------------------------------------------|
| <b>Trematoda</b> |                                            |                                                                                                                                                                                                        |
| Nicaragua        | <i>Ascocotyle pindoramensis</i>            | <b>A. labiatus</b>                                                                                                                                                                                     |
|                  | <i>Crassicutis cichlasomae</i>             | <b>A. citrinellus, A. labiatus</b> , <i>A. centrarchus</i> , <i>A. nigrofasciata</i> , <i>C. rostratus</i> , <i>H. nicaraguensis</i> , <i>H. nematopus</i> , <i>Parachromis</i> spp., <i>Vieja</i> sp. |
|                  | <i>Ithyoclinostomum yamagutii</i>          | <i>H. nicaraguensis</i> , <i>H. nematopus</i> , <i>Parachromis</i> spp.                                                                                                                                |
|                  | <i>Oligogonotylus manteri</i>              | <b>A. citrinellus, A. labiatus</b> , <i>C. rostratus</i> , <i>H. nicaraguensis</i> , <i>H. nematopus</i> , <i>Parachromis</i> spp.                                                                     |
|                  | <i>Posthodiplostomum</i> sp. 1             | <i>H. nematopus</i>                                                                                                                                                                                    |
|                  | <i>Posthodiplostomum</i> sp. 2             | <i>A. nigrofasciata</i>                                                                                                                                                                                |
|                  | <i>Saccocoleioides</i> cf. <i>lamothei</i> | <i>H. nematopus</i>                                                                                                                                                                                    |
|                  | <i>Saccocoleioides</i> spp.                | <i>H. nematopus</i>                                                                                                                                                                                    |
|                  | Strigeidae gen sp.                         | <i>H. nematopus</i>                                                                                                                                                                                    |
| Managua          | <i>Ascocotyle pindoramensis</i>            | <i>Parachromis</i> sp.                                                                                                                                                                                 |
|                  | <i>Austrodiplostomum compactum</i>         | <b>A. citrinellus</b> , <i>C. rostratus</i> , <i>Parachromis</i> spp.                                                                                                                                  |
|                  | <i>Crassicutis cichlasomae</i>             | <b>A. citrinellus, A. labiatus</b> , <i>C. rostratus</i> , <i>Parachromis</i> spp.                                                                                                                     |
|                  | Cryptogonimidae gen. sp.                   | <i>Parachromis</i> spp.                                                                                                                                                                                |
|                  | Heterophyidae gen. sp.                     | <i>Oreochromis</i> sp.                                                                                                                                                                                 |
|                  | <i>Oligogonotylus manteri</i>              | <b>A. citrinellus, A. labiatus</b> , <i>C. rostratus</i> , <i>H. nematopus</i> , <i>Parachromis</i> spp.                                                                                               |
| Asososca León    | <i>Saccocoleioides</i> spp.                | <b>A. citrinellus</b> , <i>Oreochromis</i> sp., <i>Parachromis</i> spp.                                                                                                                                |
|                  | <i>Crassicutis cichlasomae</i>             | <b>A. citrinellus</b>                                                                                                                                                                                  |
|                  | <i>Oligogonotylus manteri</i>              | <b>A. citrinellus</b> , <i>Parachromis</i> spp.                                                                                                                                                        |
|                  | <i>Saccocoleioides</i> cf. <i>lamothei</i> | <b>A. citrinellus</b> , <i>Oreochromis</i> sp.                                                                                                                                                         |
|                  | <i>Saccocoleioides orosiensis</i>          | <i>Oreochromis</i> sp.                                                                                                                                                                                 |
| Apoyeque         | <i>Saccocoleioides</i> spp.                | <b>A. citrinellus</b> , <i>Oreochromis</i> sp.                                                                                                                                                         |
|                  | <i>Crassicutis cichlasomae</i>             | <b>A. citrinellus</b> , <i>Parachromis</i> spp.                                                                                                                                                        |
|                  | <i>Oligogonotylus manteri</i>              | <b>A. citrinellus</b> , <i>Parachromis</i> spp.                                                                                                                                                        |
| Xiloá            | <i>Crassicutis cichlasomae</i>             | <b>A. amarillo, A. sagittae, A. xiloaensis</b> , <i>C. longimanus</i> , <i>A. nigrofasciata</i> , <i>C. rostratus</i> , <i>H. nicaraguensis</i>                                                        |
|                  | <i>Oligogonotylus manteri</i>              | <b>A. amarillo, A. sagittae, A. xiloaensis</b> , <i>C. longimanus</i> , <i>C. rostratus</i> , <i>H. nicaraguensis</i> , <i>H. nematopus</i> , <i>Parachromis</i> spp.                                  |
|                  | <i>Saccocoleioides orosiensis</i>          | <b>A. sagittae, A. xiloaensis</b> , <i>H. nicaraguensis</i> , <i>H. nematopus</i>                                                                                                                      |
|                  | <i>Saccocoleioides</i> spp.                | <b>A. sagittae</b>                                                                                                                                                                                     |
| Masaya           | <i>Crassicutis cichlasomae</i>             | <b>A. citrinellus</b> , <i>C. longimanus</i>                                                                                                                                                           |
|                  | <i>Oligogonotylus manteri</i>              | <b>A. citrinellus</b> , <i>H. nematopus</i>                                                                                                                                                            |
|                  | <i>Posthodiplostomum</i> sp. 1             | <i>H. nematopus</i>                                                                                                                                                                                    |
| Apoyo            | <i>Crassicutis cichlasomae</i>             | <b>A. astorquii, A. chancho, A. globosus, A. flaveolus, A. zaliosus</b> , <i>Parachromis</i> spp.                                                                                                      |
|                  | <i>Oligogonotylus manteri</i>              | <b>A. astorquii, A. chancho, A. globosus, A. zaliosus</b> , <i>Parachromis</i> spp.                                                                                                                    |
|                  | <i>Saccocoleioides orosiensis</i>          | <b>A. astorquii, A. chancho, A. zaliosus</b> , <i>A. nigrofasciata</i>                                                                                                                                 |
|                  | <i>Saccocoleioides</i> spp.                | <b>A. astorquii, A. chancho, A. flaveolus, A. globosus, A. zaliosus</b>                                                                                                                                |

**Cestoda**

|           |                                   |                                                 |
|-----------|-----------------------------------|-------------------------------------------------|
| Nicaragua | <i>Cichlidocestus janikae</i>     | <b>A. citrinellus</b> , <i>H. nicaraguensis</i> |
| Managua   | <i>Schyzocotyle acheilognathi</i> | <b>A. citrinellus</b>                           |
| Xiloá     | <i>Schyzocotyle acheilognathi</i> | <i>Parachromis</i> spp.                         |

**Monogenea**

|               |                                      |                                                                                                              |
|---------------|--------------------------------------|--------------------------------------------------------------------------------------------------------------|
| Nicaragua     | <i>Sciadicleithrum mexicanum</i>     | <b>A. citrinellus</b> , <i>Parachromis</i> spp.                                                              |
|               | <i>Sciadicleithrum</i> sp. 2         | <i>C. rostratus</i>                                                                                          |
| Managua       | <i>Sciadicleithrum mexicanum</i>     | <b>A. citrinellus</b> , <i>Parachromis</i> spp.                                                              |
| Asososca León | <i>Cichlidogyrus sclerosus</i>       | <i>Oreochromis</i> sp.                                                                                       |
|               | <i>Sciadicleithrum mexicanum</i>     | <i>Parachromis</i> spp.                                                                                      |
| Apoyeque      | <i>Sciadicleithrum mexicanum</i>     | <i>Parachromis</i> spp.                                                                                      |
| Xiloá         | <i>Sciadicleithrum mexicanum</i>     | <b>A. amarillo</b> , <b>A. sagittae</b> , <b>A. xiloaensis</b>                                               |
|               | <i>Sciadicleithrum</i> sp. 1         | <i>A. nigrofasciata</i>                                                                                      |
| Masaya        | <i>Sciadicleithrum mexicanum</i>     | <b>A. citrinellus</b>                                                                                        |
|               | <i>Sciadicleithrum nicaraguensis</i> | <i>C. longimanus</i>                                                                                         |
| Apoyo         | <i>Sciadicleithrum mexicanum</i>     | <b>A. astorquii</b> , <b>A. flaveolus</b> , <b>A. chancho</b> , <b>A. zaliosus</b> , <i>Parachromis</i> spp. |

**Acantocephala**

|               |                                       |                                                                                                                                                 |
|---------------|---------------------------------------|-------------------------------------------------------------------------------------------------------------------------------------------------|
| Nicaragua     | <i>Polymorphus brevis</i>             | <b>A. citrinellus</b> , <b>A. labiatus</b> , <i>H. nematopus</i> , <i>Parachromis</i> spp., <i>Vieja</i> sp.                                    |
|               | <i>Neoechinorynchus costarricense</i> | <b>A. labiatus</b> , <i>A. nigrofasciata</i> , <i>H. nematopus</i> , <i>H. nicaraguensis</i> , <i>H. multispinosa</i> , <i>Parachromis</i> spp. |
| Managua       | <i>Neoechinorynchus costarricense</i> | <b>A. citrinellus</b>                                                                                                                           |
| Asososca León | <i>Neoechinorynchus costarricense</i> | <b>A. citrinellus</b> , <i>Parachromis</i> spp., <i>Oreochromis</i> sp.                                                                         |
| Apoyeque      | <i>Neoechinorynchus costarricense</i> | <b>A. citrinellus</b> , <i>Parachromis</i> spp.                                                                                                 |
| Xiloá         | <i>Neoechinorynchus costarricense</i> | <b>A. amarillo</b> , <b>A. xiloaensis</b> , <b>A. sagittae</b> , <i>A. nigrofasciata</i> , <i>C. longimanus</i> , <i>Parachromis</i> spp.       |
| Masaya        | <i>Neoechinorynchus costarricense</i> | <b>A. citrinellus</b>                                                                                                                           |
| Apoyo         | <i>Neoechinorynchus costarricense</i> | <b>A. astorquii</b> , <b>A. chancho</b> , <b>A. zaliosus</b> , <i>A. nigrofasciata</i> , <i>Parachromis</i> spp.                                |

**Nematoda**

|               |                              |                                                                                                                                                                                      |
|---------------|------------------------------|--------------------------------------------------------------------------------------------------------------------------------------------------------------------------------------|
| Nicaragua     | <i>Contracaecum</i> sp. 1    | <b>A. citrinellus</b> , <b>A. labiatus</b> , <i>A. centrarchus</i> , <i>C. rostratus</i> , <i>H. nicaraguensis</i> , <i>H. nematopus</i> , <i>Parachromis</i> spp., <i>Vieja</i> sp. |
|               | <i>Physocephalus</i> sp.     | <b>A. labiatus</b>                                                                                                                                                                   |
|               | <i>Procamallanus barlowi</i> | <b>A. citrinellus</b> , <b>A. labiatus</b> , <i>C. longimanus</i> , <i>C. rostratus</i> , <i>H. nicaraguensis</i> , <i>H. nematopus</i>                                              |
|               | <i>Rhabdochona</i> sp.       | <b>A. citrinellus</b>                                                                                                                                                                |
| Managua       | <i>Contracaecum</i> sp. 1    | <b>A. citrinellus</b> , <b>A. labiatus</b> , <i>C. rostratus</i> , <i>Parachromis</i> spp.                                                                                           |
|               | <i>Procamallanus barlowi</i> | <b>A. citrinellus</b> , <b>A. labiatus</b> , <i>Parachromis</i> spp.,                                                                                                                |
| Asososca León | <i>Contracaecum</i> sp. 1    | <b>A. citrinellus</b> , <i>Parachromis</i> spp.                                                                                                                                      |
|               | <i>Contracaecum</i> sp. 2    | <b>A. citrinellus</b> , <i>Parachromis</i> spp.                                                                                                                                      |
|               | <i>Contracaecum</i> sp. 3    | <b>A. citrinellus</b> , <i>Parachromis</i> spp.                                                                                                                                      |
|               | <i>Procamallanus barlowi</i> | <b>A. citrinellus</b>                                                                                                                                                                |
| Apoyeque      | <i>Procamallanus barlowi</i> | <i>Parachromis</i> spp.                                                                                                                                                              |
| Xiloá         | <i>Contracaecum</i> sp. 1    | <b>A. amarillo</b> , <b>A. sagittae</b> , <b>A. xiloaensis</b> , <i>C. rostratus</i> , <i>H. nicaraguensis</i> , <i>H. nematopus</i> , <i>Parachromis</i> spp.                       |
|               | <i>Goezia</i> sp.            | <b>A. sagittae</b>                                                                                                                                                                   |

|                    |                                                                                           |                                                                                                                                                                                                                                  |
|--------------------|-------------------------------------------------------------------------------------------|----------------------------------------------------------------------------------------------------------------------------------------------------------------------------------------------------------------------------------|
| Masaya             | <i>Hysterothylacium</i> sp.<br><i>Contraecaecum</i> sp. 1<br><i>Procamallanus barlowi</i> | <i>Parachromis</i> spp.<br><b>A. citrinellus</b> , <i>C. longimanus</i><br><b>A. citrinellus</b> , <i>C. longimanus</i>                                                                                                          |
| Apoyo              | <i>Contraecaecum</i> sp. 1<br><i>Goezia</i> sp.<br><i>Procamallanus barlowi</i>           | <b>A. astorquii</b> , <b>A. chancho</b> , <b>A. zaliosus</b> , <i>Parachromis</i> spp.<br><b>A. zaliosus</b><br><b>A. astorquii</b> , <b>A. chancho</b> , <b>A. zaliosus</b> , <i>A. nigrofasciata</i> , <i>Parachromis</i> spp. |
| <b>Hirudinea</b>   |                                                                                           |                                                                                                                                                                                                                                  |
| Nicaragua          | <i>Myzobdella</i> sp.                                                                     | <i>Parachromis</i> spp.                                                                                                                                                                                                          |
| <b>Copepoda</b>    |                                                                                           |                                                                                                                                                                                                                                  |
| Nicaragua          | <i>Acusicola</i> sp.<br>Ergasilidae gen. sp.                                              | <b>A. citrinellus</b> , <b>A. labiatus</b><br><b>A. citrinellus</b> , <b>A. labiatus</b> , <i>H. nematopus</i> , <i>H. nicaraguensis</i> , <i>Parachromis</i> spp., <i>Vieja</i> sp.                                             |
| Managua            | Ergasilidae gen. sp.<br><i>Lernaea cyprinacea</i><br>Lernaeidae gen. sp.                  | <b>A. citrinellus</b> , <b>A. labiatus</b> , <i>C. rostratus</i> , <i>Parachromis</i> spp.<br><i>H. nematopus</i><br><b>A. citrinellus</b> , <b>A. labiatus</b>                                                                  |
| Asososca León      | <i>Acusicola margulisae</i>                                                               | <b>A. citrinellus</b> , <i>Parachromis</i> spp., <i>Oreochromis</i> sp.                                                                                                                                                          |
| Xiloá              | Ergasilidae gen. sp.                                                                      | <b>A. amarillo</b> , <b>A. sagittae</b> , <b>A. xiloensis</b> , <i>A. nigrofasciata</i> , <i>C. longimanus</i> , <i>H. nicaraguensis</i> , <i>Parachromis</i> spp.                                                               |
| Apoyo              | Ergasilidae gen. sp.                                                                      | <b>A. astorquii</b>                                                                                                                                                                                                              |
| <b>Branchiura</b>  |                                                                                           |                                                                                                                                                                                                                                  |
| Asososca León      | <i>Argulus</i> sp.                                                                        | <b>A. citrinellus</b>                                                                                                                                                                                                            |
| Xiloá              | <i>Argulus</i> sp.                                                                        | <b>A. sagittae</b>                                                                                                                                                                                                               |
| <b>Acariformes</b> |                                                                                           |                                                                                                                                                                                                                                  |
| Xiloá              | Oribatide gen. sp.                                                                        | <i>Parachromis</i> spp.                                                                                                                                                                                                          |
